# Supplementary material
Source: PubMed Central journal article supplement (PMC7190410)

## **Supplementary Material**

Table S1. MRD/ Flow status at MRD level and response according to IWMG in high-risk myeloma patients

|                    | MRD/ Flow negative | MRD/ Flow positive |
|--------------------|--------------------|--------------------|
| Complete remission | 8 (50%)            | 8 (50%)            |
| PR or VGPR         | 5 (38%)            | 8 (62%)            |

Journal Pre-proof

Figure S1. Overall survival of high-risk myeloma patients who were MRD negative by remission status (CR or NOT CR [PR/VGPR]). Median OS was not reached in either group.

OS of high-risk patients achieved MRD negative by CR status

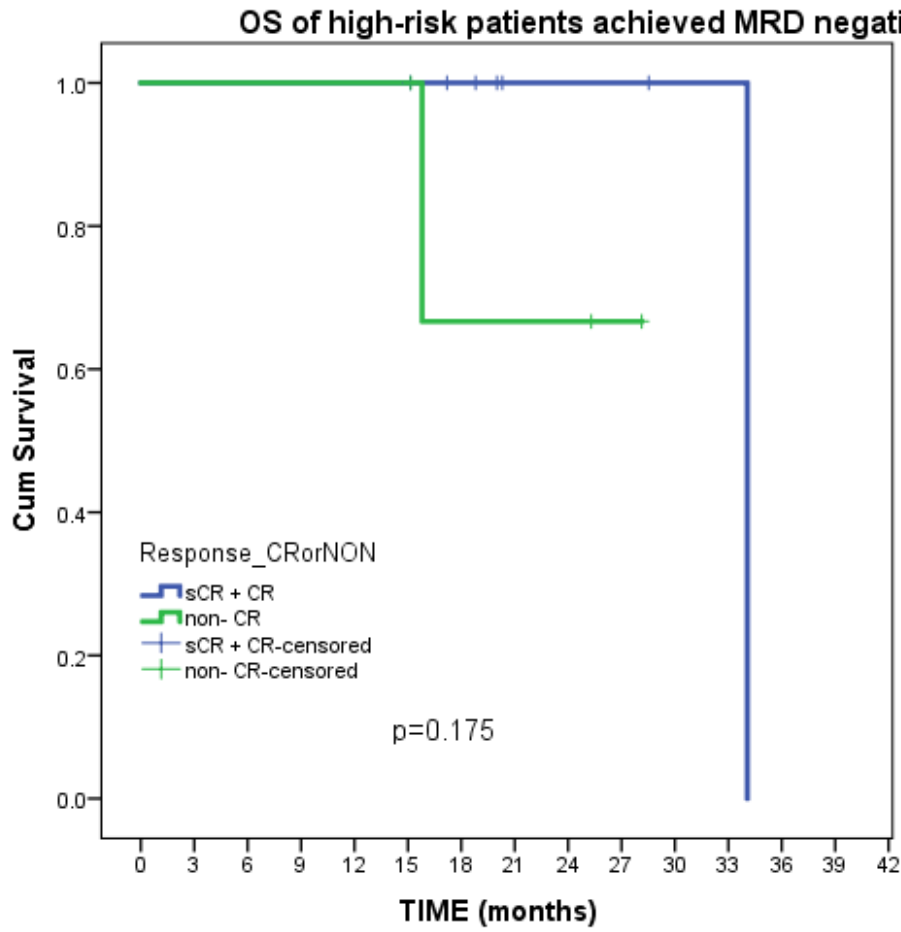

Figure S2. Progression free survival of high-risk myeloma patients who were MRD negative by remission status (CR and NOT CR [PR/VGPR]). Median PFS was not reached and 23 months in CR and not CR patients, respectively.

### PFS of high-risk myeloma patients who achieved MRD/flow negativity by CR status

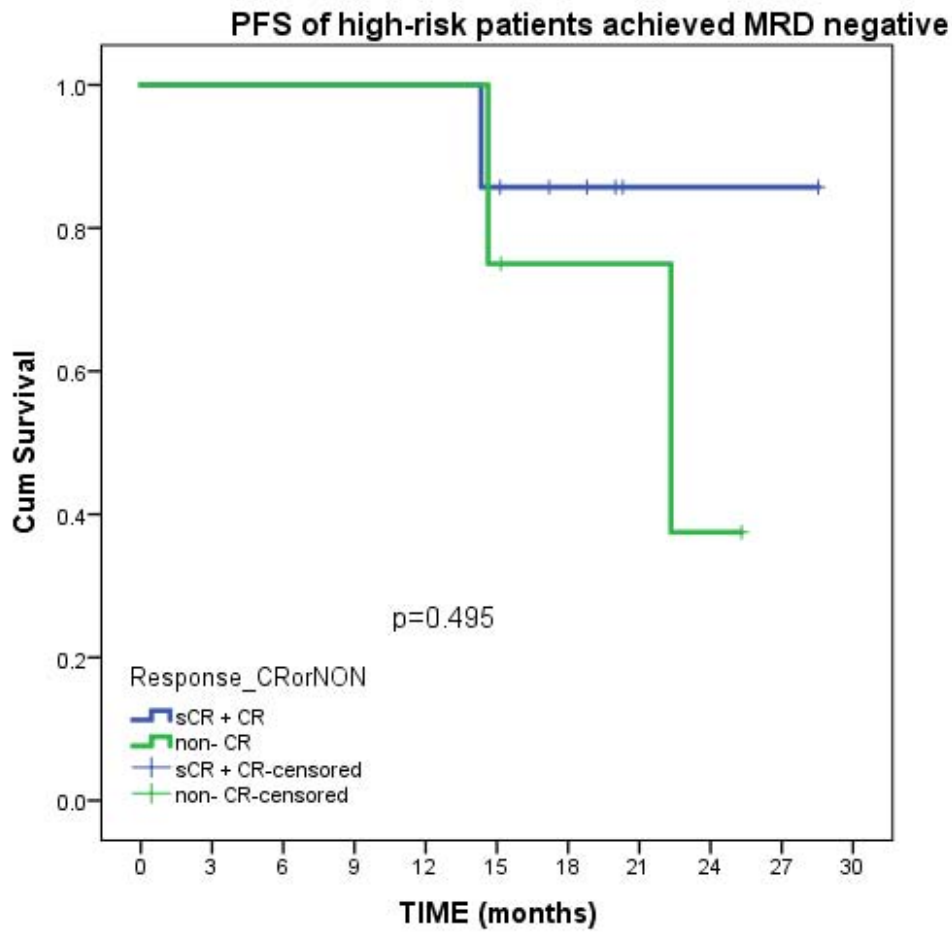

Figure S3. Progression free survival of high-risk myeloma patients who achieved CR by MRD status. Median PFS was not reached in either group

**PFS of high-risk myeloma patients who achieved CR by MRD status**

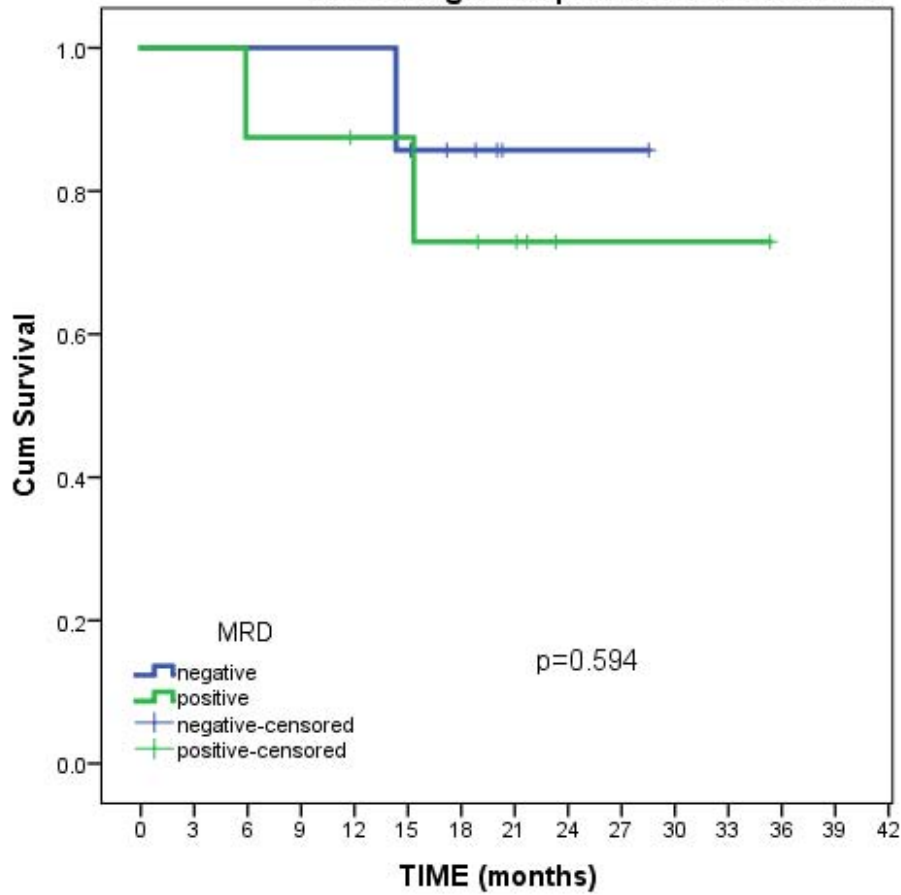

Figure S4. Overall survival of high-risk myeloma patients who achieved CR by MRD status. Median OS was not reached in either group.

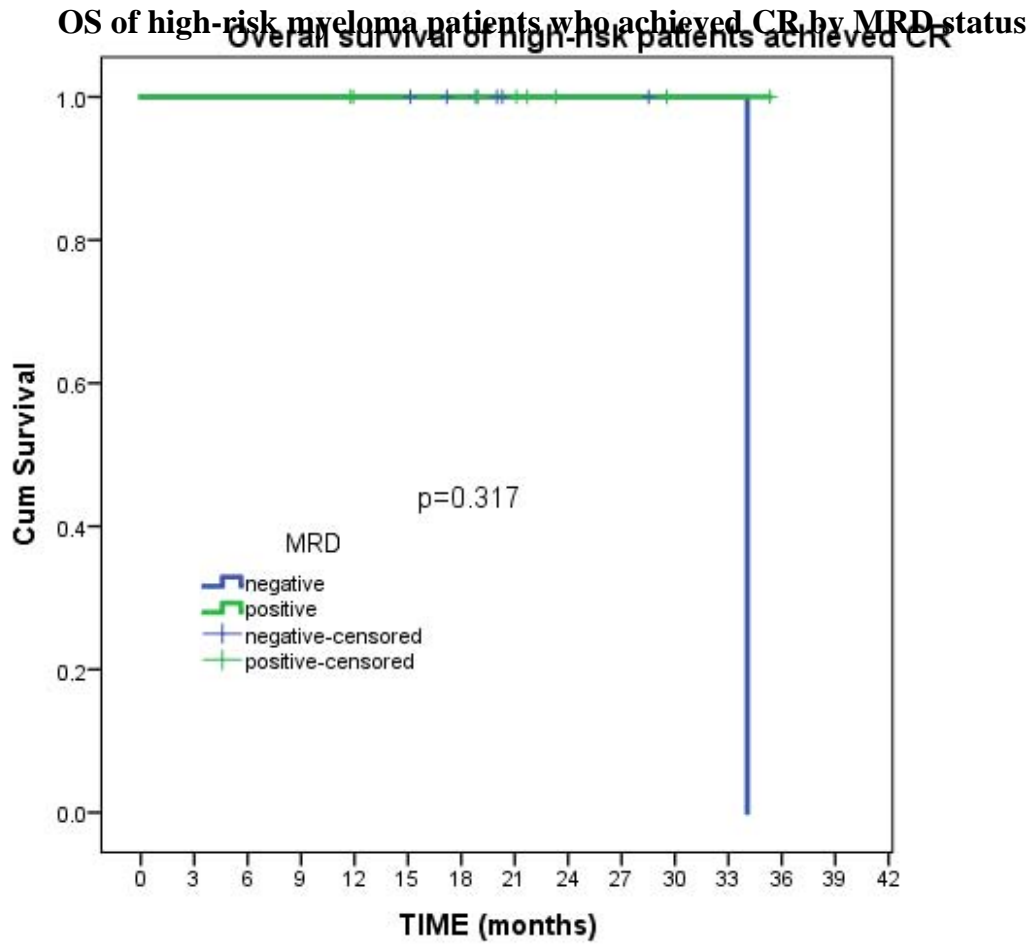

Figure S5. Progression free survival of high-risk myeloma patients who did not achieve a CR by flow status. Median PFS was 23 and 30 months in flow positive and negative patients, respectively.

**PFS of high-risk myeloma patients who did not achieve CR by flow status**

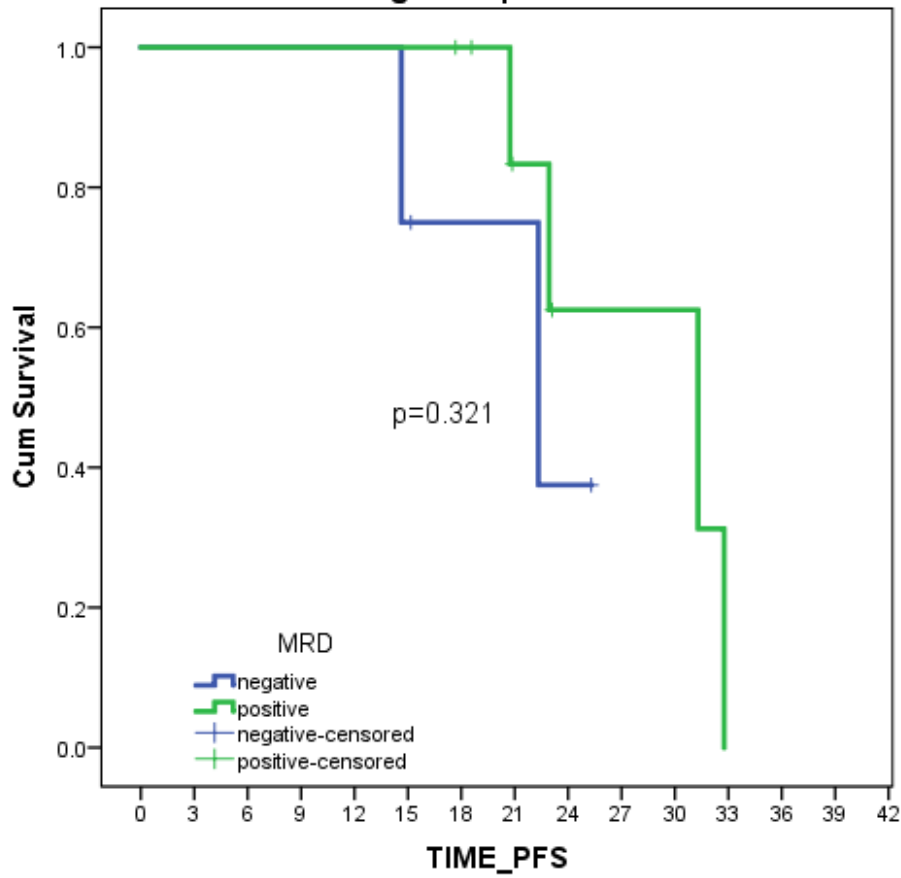

Figure S6. Overall survival of high-risk myeloma patients who did not achieve CR by flow status. Median OS was not reached in either group.

OS of high-risk myeloma patients who did not achieve CR by flow status

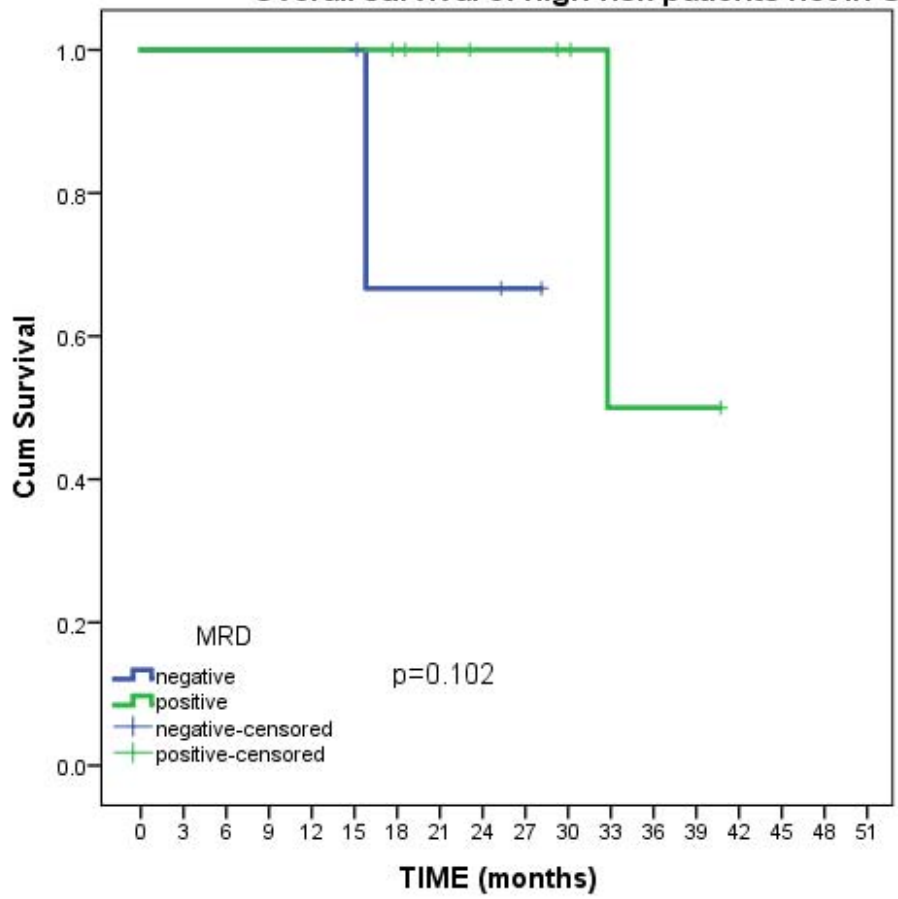

Figure S7. Progression free survival in high-risk myeloma patients by CR and MRD status.

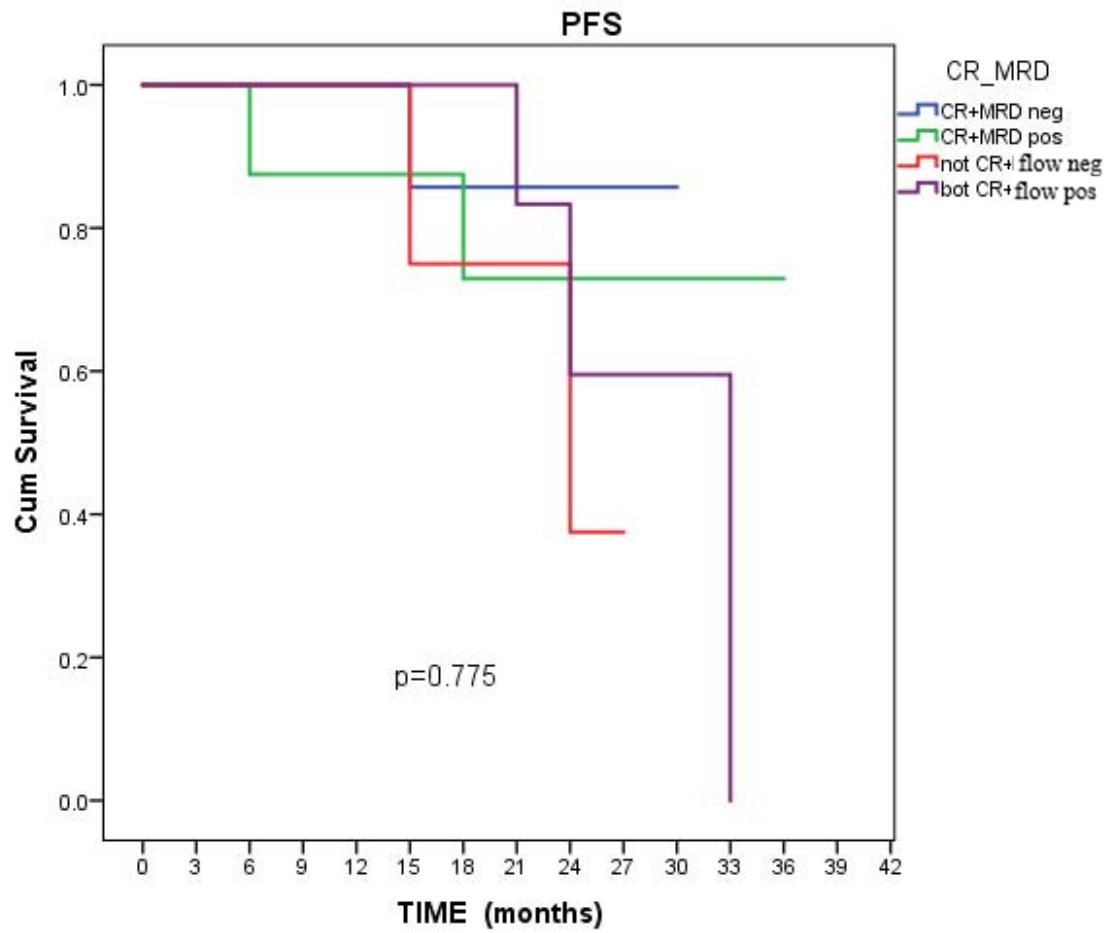



Figure S8. Overall survival in high-risk myeloma patients by CR and MRD status.

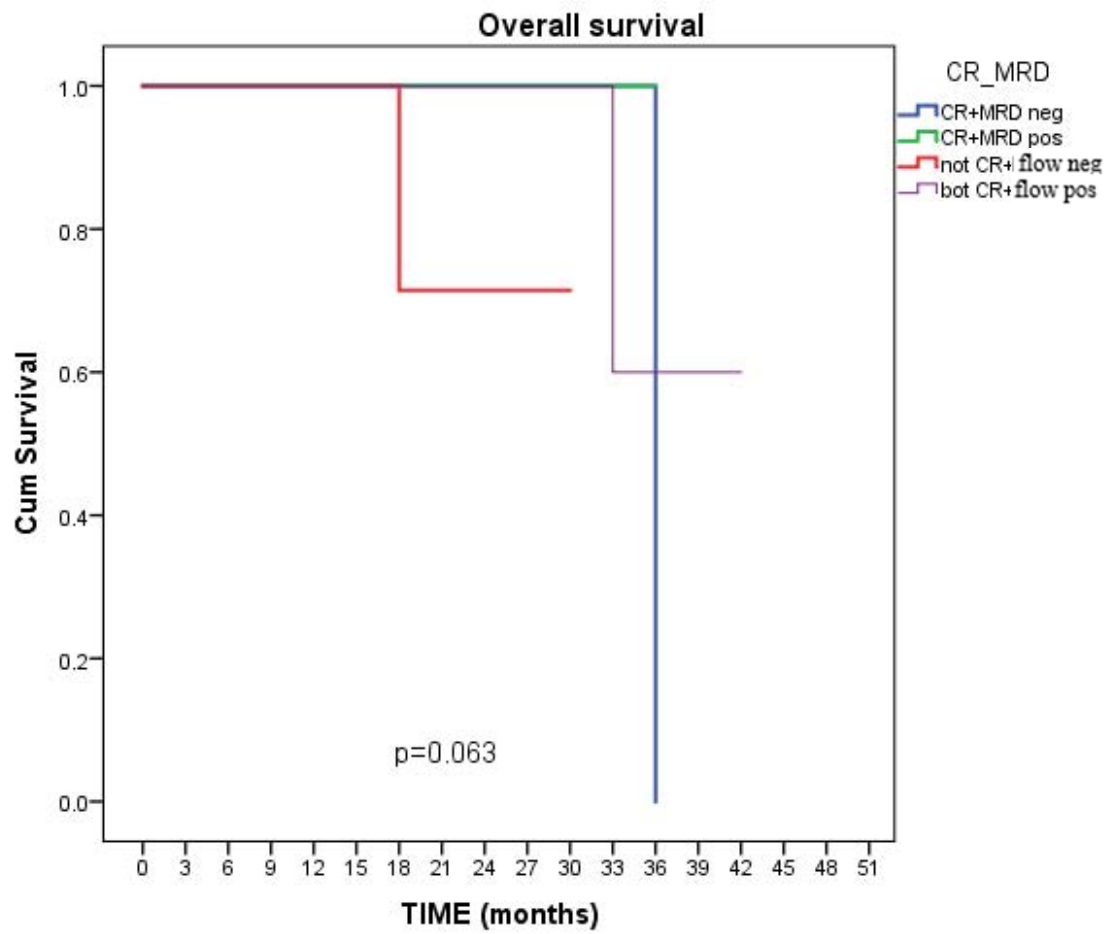

Supplement: NIHMS1549890-supplement-1.pdf [file NIHMS1549890-supplement-1.pdf]
